# Supplementary material for: Interaction of Klebsiella pneumoniae with tissue macrophages in a mouse infection model and ex-vivo pig organ perfusions: an exploratory investigation
Source: PubMed Central journal article supplement (PMC8641047; doi:10.1016/s2666-5247(21)00195-6), 2021-12
Supplement: mmc1.pdf [file mmc1.pdf]

# THE LANCET Microbe

## Supplementary appendix

This appendix formed part of the original submission and has been peer reviewed. We post it as supplied by the authors.

Supplement to: Wanford JJ, Hames RG, Carreno D, et al. Interaction of *Klebsiella pneumoniae* with tissue macrophages in a mouse infection model and ex-vivo pig organ perfusions: an exploratory investigation. *Lancet Microbe* 2021; published online Oct 18. [https://doi.org/10.1016/S2666-5247\(21\)00195-6](https://doi.org/10.1016/S2666-5247(21)00195-6).

## Supplementary materials

### Interaction of *Klebsiella pneumoniae* with tissue macrophages in a mouse infection model and ex-vivo pig organ perfusions: an exploratory investigation

Joseph J. Wanford, Ryan G. Hames, David Carreno, Zydrune Jasiunaite, Wen Y. Chung, Fabio Arena, Vincenzo Di Pilato, Kornelis Straatman, Kevin West, Robeena Farzand, Mariagrazia Pizza, Luisa Martinez-Pomares, Peter W. Andrew, E. Richard Moxon, Ashley R. Dennison, Gian Maria Rossolini, Marco R. Oggioni.

#### INDEX

|                |                                                                                                                      | <b>Page</b> |
|----------------|----------------------------------------------------------------------------------------------------------------------|-------------|
| Table S1       | Bacterial strains and metadata                                                                                       | 2           |
| Table S2       | Antibodies and reagents used for immunohistochemistry                                                                | 3           |
| Table S3       | Pipeline for statistical analysis in this manuscript                                                                 | 4           |
| Figure S1      | Fiji analysis pipeline for analysing distribution of bacteria in tissue                                              | 6           |
| Figure S2      | Low magnification image of multispectral images of liver section, and confocal Z-stacks used for 3D reconstructions  | 7           |
| Figure S3      | Growth kinetics of <i>Kp</i> strains following inoculation of rich medium BHI                                        | 9           |
| Figure S4      | Low magnification image of multispectral images of spleen section, and confocal Z-stacks used for 3D reconstructions | 10          |
| Figure S5      | Foci size analysis of time course infections in the murine spleen                                                    | 12          |
| Figure S6      | Evidence of Kupffer cell lysis following infection                                                                   | 14          |
| Figure S7      | Histological features of <i>Kp</i> infected mouse spleens                                                            | 16          |
| Figure S8      | A normothermic model of liver-spleen co-perfusion for studies of <i>Kp</i> -host interactions                        | 17          |
| Figure S9      | Independent replicates of <i>ex vivo</i> perfusion experiments                                                       | 18          |
| Figure S10     | Microarchitecture of the porcine liver and spleen visible through multispectral imaging                              | 20          |
| Suppl. Methods |                                                                                                                      | 22          |
| References     |                                                                                                                      | 26          |

**Table S1.** Bacterial strains and metadata

| Strain name | Serotype    | ST   | Source                         | hvKp phenotype | Resistance phenotype | Carbapenemase              | Virulence genes                        | Genome accession | Source                                           | Ref |
|-------------|-------------|------|--------------------------------|----------------|----------------------|----------------------------|----------------------------------------|------------------|--------------------------------------------------|-----|
| NTUH-K2044  | K1: O1v2    | 23   | Human, blood, Taiwan           | +              | -                    | -                          | <i>ybt, iuc, iro, rmpA, rmpA2</i>      | AP006725.1       | Pei-Fang Hsieh and Jin-Town Wang, Taipei, Taiwan | 1   |
| RM1628      | K1: O1v2    | 1861 | Human, blood, Italy            | +              | -                    | -                          | <i>ybt, clb, iuc, iro, rmpA, rmpA2</i> | JAALJC000000000  | Teresa Spanu, Roma, Italy,                       | 2   |
| SGH10       | K1: O1v2    | 23   | Human liver abscess, Singapore | +              | -                    | -                          | <i>ybt, clb, iuc, iro, rmpA, rmpA2</i> | NZ_CP025080.1    | NCTC                                             | 3   |
| GMR151      | K2: O1v2    | 25   | Human, blood, Italy            | +              | ESBL                 | -                          | <i>iuc, iro, rmpA, rmpA2</i>           | JAALJD000000000  | Rossana Cavallo, Torino, Italy                   | N/A |
| HMV-1       | K2: O1v1    | 86   | Human, blood, Italy            | +              | -                    | -                          | <i>ybt, iro, rmpA</i>                  | JAALCW000000000  | Rossolini, Florence, Italy                       | N/A |
| HMV-2       | K2: O1v2    | 65   | Human, blood, Italy            | +              | -                    | -                          | <i>iuc, iro, rmpA, rmpA2</i>           | JAALCV000000000  | Rossolini, Florence, Italy                       | N/A |
| KPC157      | KL107: O2v2 | 512  | Human, rectal swab, Italy      | -              | CR                   | <i>bla<sub>KPC-3</sub></i> | -                                      | JAALCT000000000  | Rossolini, Florence, Italy                       | N/A |
| KKBO-1      | KL107: O2v2 | 258  | Human, blood, Italy            | -              | CR                   | <i>bla<sub>KPC-3</sub></i> | -                                      | GCA_000495875.1  | Rossolini, Florence, Italy                       | 4   |
| KK207-1     | KL107: O2v2 | 258  | Human, blood, Italy            | -              | CR                   | <i>bla<sub>KPC-2</sub></i> | -                                      | GCA_001399815.1  | Rossolini, Florence, Italy                       | 5   |
| HS11286     | KL103: O2v2 | 11   | Human, sputum, China           | -              | CR                   | <i>bla<sub>KPC-2</sub></i> | <i>ybt</i>                             | NC_016845.1      | Hong-Yu Ou, Shanghai                             | 6   |
| DG5544      | K17: O1v1   | 2502 | Human, rectal swab, Italy      | -              | CR                   | <i>bla<sub>KPC-3</sub></i> | <i>ybt</i>                             | GCF_003227695.1  | Rossolini, Florence, Italy                       | 7   |
| KPC58       | K17: O1v1   | 101  | Human, blood, Italy            | -              | CR                   | <i>bla<sub>KPC-2</sub></i> | <i>ybt</i>                             | JAALCT000000000  | Rossolini, Florence, Italy                       | N/A |
| KPC284      | K17: O1v1   | 101  | Human, blood, Italy            | -              | CR                   | <i>bla<sub>KPC-2</sub></i> | <i>ybt</i>                             | JAALCS000000000  | Rossolini, Florence, Italy                       | 8   |

Abbreviations: ESBL, extended-spectrum  $\beta$ -lactamase; CR, carbapenem-resistant; *ybt*, yersiniabactin; *iuc*, aerobactin; *iro*, salmochelin; *clb*, colibactin; *rmpA*, regulator of mucoid phenotype;

**Table S2.** Antibodies and reagents used for immunohistochemistry

| Antibody/reagent (clone)               | Target                  | Dilution | Conjugate      | Catalogue  | Supplier                   |
|----------------------------------------|-------------------------|----------|----------------|------------|----------------------------|
| Rat anti-mouse CD169 (3D6.112)         | CD169+ MΦ               | 1:200    | None           | MCA884GA   | Biorad, USA; Ca            |
| Rat anti-mouse F4/80 (A3-1)            | RP MΦ/ Kupffer cells    | 1:200    | None           | MCA497RT   | Biorad, USA; Ca            |
| Rat anti-mouse MARCO (ED31)            | MZM MΦ                  | 1:200    | None           | MCA1849T   | Biorad, USA; Ca            |
| Rabbit anti-K1 antisera                | <i>Kp</i> serotype K1   | 1:500    | None           | N/A        | SSI, Denmark,<br>København |
| Rabbit anti-K2 antisera                | <i>Kp</i> serotype K2   | 1:500    | None           | N/A        | SSI, Denmark,<br>København |
| Rabbit anti-pan <i>Klebsiella</i>      | <i>Kp</i>               | 1:200    | None           | aBii0947   | Abcam, UK; Cambridge       |
| Rat anti-mouse Ly-6G (1A8)             | Neutrophils             | 1:200    | None           | MCA711A647 | Biorad, USA; Ca            |
| Mouse anti-porcine CD169 (3B11/11)     | CD169+ MΦ               | 1:200    | None           | MCAII316GA | Biorad, USA; Ca            |
| Mouse anti-porcine CD163 (2A10/11)     | CD163+ MΦ               | 1:200    | None           | MCAII311GA | Biorad, USA; Ca            |
| Mouse anti-porcine granulocytes (2BII) | Granulocytes            | 1:200    | None           | MCAII600GA | Biorad, USA; Ca            |
| Goat anti-rat IgG - 647                | Rat primary antibody    | 1:500    | Alexafluor 647 | A-21247    | Thermo, USA, Ma            |
| Goat anti-rat IgG - 568                | Rat primary antibody    | 1:500    | Alexafluor 568 | A-11077    | Thermo, USA, Ma            |
| Goat anti-rabbit IgG - 488             | Rabbit primary antibody | 1:500    | Alexafluor 488 | A-11008    | Thermo, USA, Ma            |
| Goat anti-mouse IgG - 568              | Mouse primary antibody  | 1:500    | Alexafluor 568 | A-21124    | Thermo, USA, Ma            |
| Phalloidin                             | Actin                   | 1:100    | Alexafluor 647 | AII2287    | Thermo, USA, Ma            |
| Texas red conjugation kit              | N/A                     | N/A      | Texas red      | aBi95225   | Abcam, UK; Cambridge       |
| FITC conjugation kit                   | N/A                     | N/A      | FITC           | aBi02884   | Abcam, UK; Cambridge       |
| DAPI                                   | Nuclei                  | N/A      | DAPI-405       | D9542      | Sigma, USA; Mo             |

MΦ; macrophage, RP; red pulp, MZM; marginal zone macrophages, N/A; not applicable; SSI Statens Serum Institut

**Table S3.** Pipeline for statistical analysis in this manuscript

| Figure | Test                                                     | Measurement                                                              | Comparison                                          | P value |
|--------|----------------------------------------------------------|--------------------------------------------------------------------------|-----------------------------------------------------|---------|
| 1a     | 2-way ANOVA with Tukey's multiple comparisons            | Fluorescence co-localisation of bacteria with host cells                 | HV vs non-HV in F4/80+ cells                        | 0.9665  |
|        |                                                          |                                                                          | HV vs non-HV F4/80- cells                           | 0.9665  |
| 1b     | Ordinary 1-way ANOVA with Tukey's multiple comparisons   | Size of cell-associated bacterial clusters in confocal microscopy images | K1 vs K2                                            | 0.7024  |
|        |                                                          |                                                                          | K1 vs K107                                          | <0.0001 |
|        |                                                          |                                                                          | K1 vs K17                                           | <0.0001 |
|        |                                                          |                                                                          | K2 vs K107                                          | 0.0003  |
|        |                                                          |                                                                          | K2 vs K17                                           | 0.0002  |
| 2a     | 2-way ANOVA with Tukey's multiple comparisons            | Fluorescence co-localisation of bacteria with host cells                 | K107 vs K17                                         | 0.9928  |
|        |                                                          |                                                                          | HV vs non-HV CD169+ cells                           | 0.2267  |
|        |                                                          |                                                                          | HV vs non-HV F4/80+ cells                           | 0.2953  |
|        |                                                          |                                                                          | HV vs non-HV White pulp                             | 0.9983  |
|        |                                                          |                                                                          | HV vs non-HV MARCO+ cells                           | 0.9972  |
| 2b     | Ordinary 1-way ANOVA with Tukey's multiple comparisons   | Size of cell-associated bacterial clusters in confocal microscopy images | K1 vs K17                                           | <0.0001 |
|        |                                                          |                                                                          | K1 vs K107                                          | <0.0001 |
|        |                                                          |                                                                          | K17 vs K107                                         | 0.8309  |
| 3a     | 2-way ANOVA with Tukey's multiple comparisons            | Bacterial CFU recovered from homogenised tissue after infection          | K1 blood, 30m vs 6h                                 | 0.0009  |
|        |                                                          |                                                                          | K1 blood, 6h vs 24h                                 | 0.0435  |
|        |                                                          |                                                                          | K1 blood, 30m vs 24h                                | <0.0001 |
|        |                                                          |                                                                          | K17 blood, 30m vs 6h                                | >0.9999 |
|        |                                                          |                                                                          | K17 blood, 6h vs 24h                                | >0.9999 |
|        |                                                          |                                                                          | K17 blood, 30m vs 24h                               | >0.9999 |
|        |                                                          |                                                                          | K1 liver, 30m vs 6h                                 | 0.6795  |
|        |                                                          |                                                                          | K1 liver, 6h vs 24h                                 | 0.8516  |
|        |                                                          |                                                                          | K1 liver, 30m vs 24h                                | 0.3582  |
| 3b     | 2-way ANOVA with Tukey's multiple comparisons            | Size of cell-associated bacterial clusters in confocal microscopy images | K7 liver, 30m vs 6h                                 | 0.5362  |
|        |                                                          |                                                                          | K7 liver, 6h vs 24h                                 | >0.9999 |
|        |                                                          |                                                                          | K7 liver, 30m vs 24h                                | 0.5292  |
|        |                                                          |                                                                          | K1, 30m vs 6h                                       | <0.0001 |
|        |                                                          |                                                                          | K1, 6h vs 24h                                       | 0.8573  |
|        |                                                          |                                                                          | K1, 30m vs 24h                                      | 0.0002  |
|        |                                                          |                                                                          | K17, 30m vs 6h                                      | >0.9999 |
|        |                                                          |                                                                          | K17, 6h vs 24h                                      | >0.9999 |
|        |                                                          |                                                                          | K17, 30m vs 24h                                     | >0.9999 |
| 4a     | Unpaired t test                                          | Intracellular bacteria recovered from infection cells                    | NTUH-k2044, 1h to 4h PI                             | 0.1307  |
|        |                                                          |                                                                          | SGH10, 1h to 4h PI                                  | 0.0288  |
|        |                                                          |                                                                          | KPC157, 1h to 4h PI                                 | 0.03    |
|        |                                                          |                                                                          | KPC58, 1h to 4h PI                                  | 0.0022  |
| 4c     | 2-way ANOVA with Sidak's multiple comparisons            | Size of cell-associated bacterial clusters in confocal microscopy images | NTUH-k2044, 1h to 4h PI                             | <0.0001 |
|        |                                                          |                                                                          | SGH10, 1h to 4h PI                                  | <0.0001 |
| 4d     | Ordinary 1-way ANOVA with Dunnett's multiple comparisons | Bacteria recovered from <i>ex vivo</i> liver cells after treatment       | Saponin vs gentamicin treatment followed by saponin | 0.0606  |
| 5a     | Ordinary 1-way ANOVA                                     | Neutrophil fluorescence signal area by confocal microscopy               | Saponin vs saponin followed by gentamicin treatment | 0.0385  |
|        |                                                          |                                                                          | 0.5 vs 24h PI                                       | 0.0006  |
|        |                                                          |                                                                          | 6 vs 24h PI                                         | 0.0017  |
| 5d     |                                                          |                                                                          | 0.5 vs 6h PI                                        | 0.4631  |
|        |                                                          |                                                                          | K1                                                  | 0.0303  |

|    |                                               |                                                                                   |                                             |                             |
|----|-----------------------------------------------|-----------------------------------------------------------------------------------|---------------------------------------------|-----------------------------|
|    | 2-way ANOVA with Tukey's multiple comparisons | Bacteria recovered after 30 min incubation with <i>ex vivo</i> murine neutrophils | K2<br>K107<br>K17                           | 0.0258<br><0.0001<br>0.0005 |
| 6a | Unpaired t test                               | Bacteria recovered from homogenised organ biopsy                                  | Spleen, 0.5 to 5h PI<br>Liver, 0.5 to 5h PI | 0.0003<br>0.0029            |
| 6c | Unpaired t test                               | Size of cell-associated bacterial clusters in confocal microscopy images          | Spleen, 0.5 to 5h PI<br>Liver, 0.5 to 5h PI | 0.0282<br>0.0188            |
| 6d | 2-way ANOVA with Tukey's multiple comparisons | Neutrophil signal area in confocal microscopy images                              | 5h infected vs UI<br>0.5h infected vs UI    | 0.0029<br>0.9329            |

---

PI; post infection

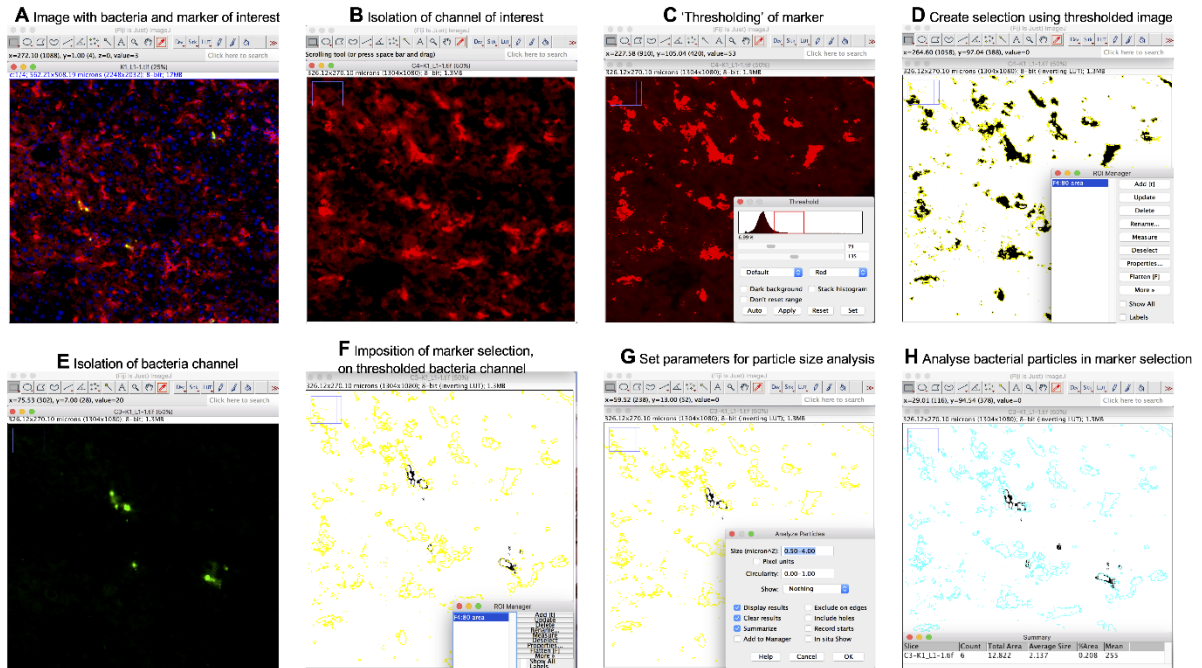

$$\% \text{ co-localization} = \frac{\text{Thresholded bacterial fluorescence area in cellular ROI}}{\text{Total thresholded bacterial fluorescence area}} \times 100$$

**Figure S1. Fiji analysis pipeline for analysing distribution of bacteria in tissue.** (A) First, a multi-colour channel image is required which includes a bacterial stain, and a stain which delineates a marker of interest. (B) Next the channel which identifies the cellular marker should be isolated using the split channels function, before (C) thresholding the image to highlight only the cell area above an arbitrary fluorescence threshold. (D) This thresholded images is then used to produce a region of interest (roi) selection. (E-F) This selection can then be applied to the bacterial fluorescence channel, before particle size analysis is performed (G-H) with suitable parameters for the bacterium of interest.

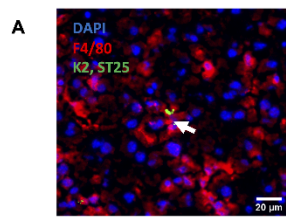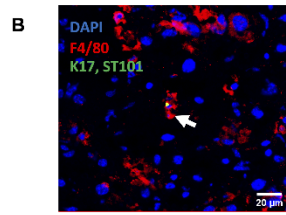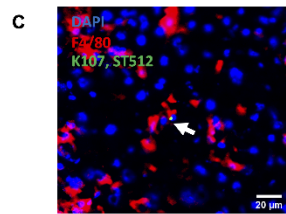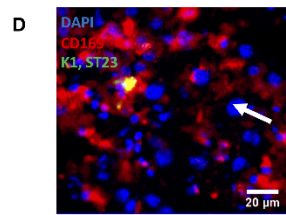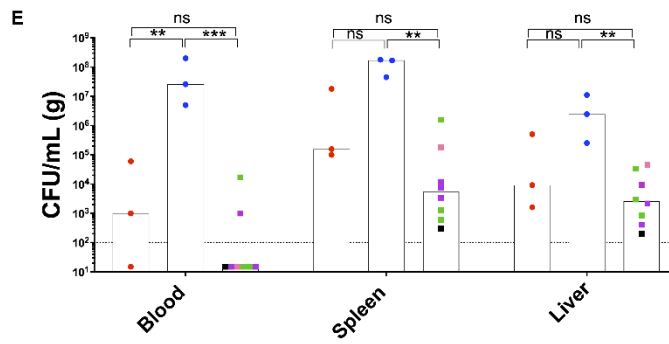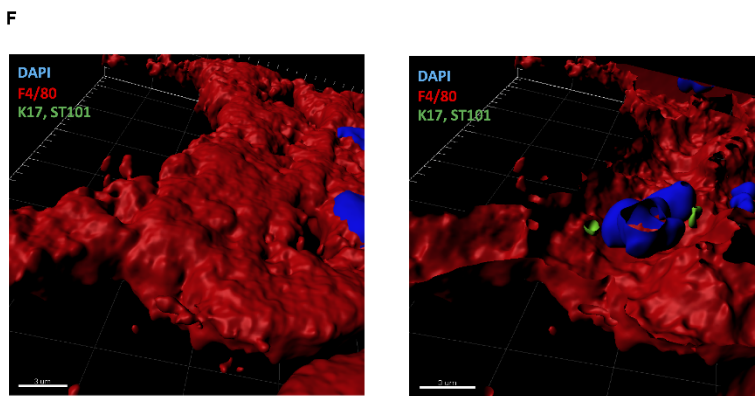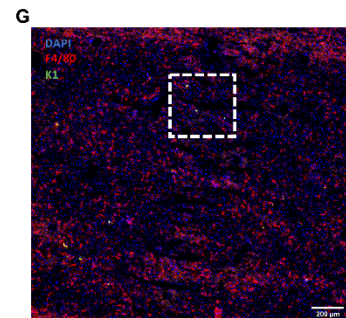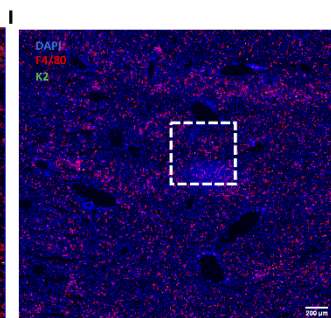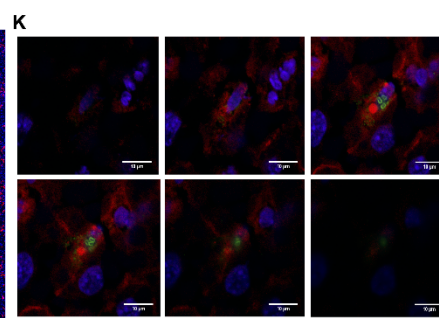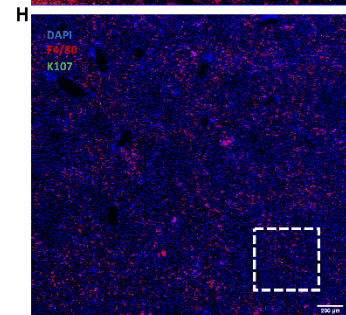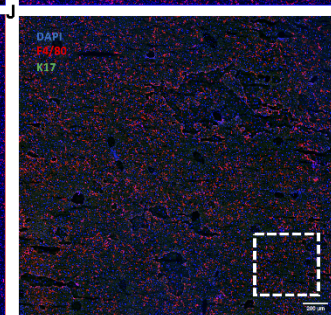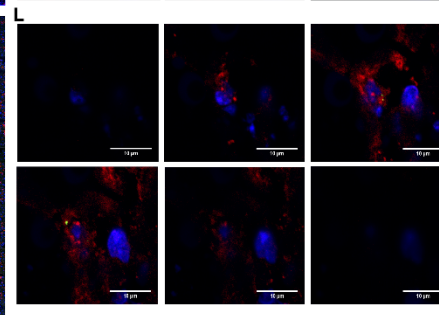



**Figure S2. Low magnification image of multispectral images of liver section, confocal Z-stacks used for 3D reconstructions, and bacterial titres in the tissue after intravenous infection.** Samples are stained with DAPI, shown in blue, F4/80 in red, and antibodies targeted against *Kp* K2 (A), K17 (B), KL107 (C), and K1 (D) shown in green in each case. The scale bar is indicated in the bottom right of each image. (E) Bacterial counts in blood, spleen and liver homogenates after 6h intravenous infection with individual strains of *Kp*. Strains are coloured by serotype, red; K1, blue; K2, purple; K17, green; K107. Data are expressed as CFU/mL of blood, or CFU/G of homogenised tissue. Statistical significance was determined by 2-way ANOVA. (F) 3D reconstructions of confocal Z-stacks showing K17 *Kp* in the confines of an F4/80 membrane stain. Low magnification scanning microscopy images of K1 (G), K2 (H), K107 (I), and K17 (J) *Kp* corresponding to higher magnification images in Figure 1 and Figures S2A-C. The areas presented in the aforementioned figures are outlined by dotted white lines. Z-stack images of K1 (K) and K17 (L) infected F4/80+ (red) macrophages. Sections are shown at 2µm optical plane intervals from the top of the tissue section (top left) to the bottom of the tissue section (bottom right). These Z stacks were used to produce the 3D reconstructions shown in Figure 1. The scale bars for these images are 10µm in width.

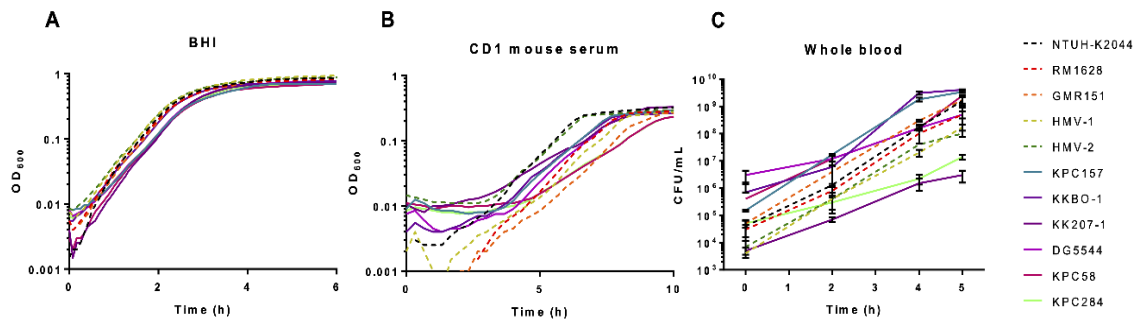

**Figure S3. Growth kinetics of *Kp* strains** following inoculation of rich medium BHI (A), *ex vivo* CD1 mouse sera (B), and *ex vivo* CD1 whole mouse blood (C) with  $\sim 10^5$  CFU of each strain. hv*Kp* strains are shown by dotted lines, whereas non-hv*Kp* strains are shown by solid lines. Strain names corresponding to the colour of each strain are shown to the right of the graph.

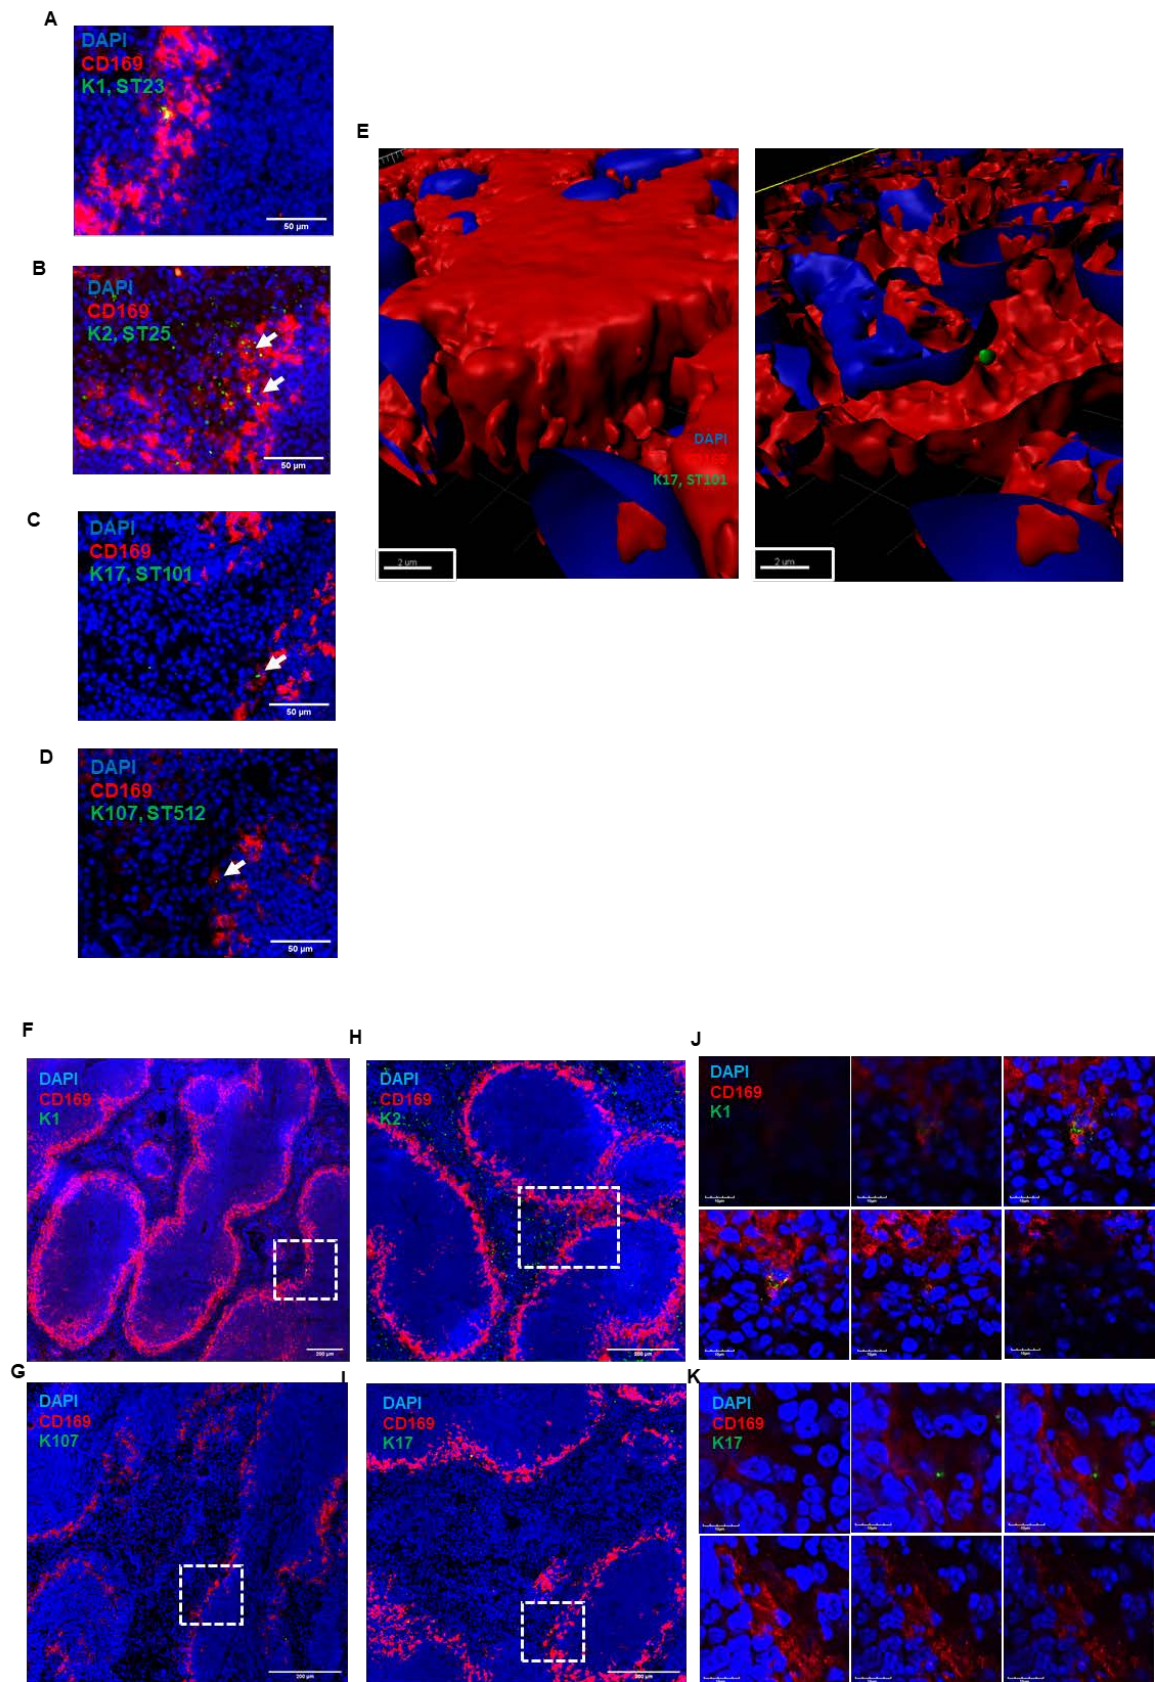

**Figure S4. Low magnification image of multispectral images of spleen section, and confocal Z-stacks used for 3D reconstructions. Samples are stained with DAPI, shown in blue, CD169 in red, and antibodies targeted against *Kp* K1 (A), K2 (B), K17 (C), KL107 (D),**

shown in green in each case. The scale bar is indicated in the bottom right of each image. (E) 3D reconstructions of confocal Z-stacks showing K17 *Kp* in the confines of an CD169 membrane stain. Low magnification scanning microscopy images of K1 (F), K2 (G), K107 (H), and K17 (I) *Kp* corresponding to higher magnification images in Figure 2 and Figures S4A-C. The areas presented in the aforementioned figures are outlined by dotted white lines. Z-stack images of K1 (J) and K17 (K) infected CD169+ (red) macrophages. Sections are shown at 2um optical plane intervals from the top of the tissue section (top left) to the bottom of the tissue section (bottom right). These Z stacks were used to produce the 3D reconstructions shown in Figure 1. The scale bars for these images are 10um in width.

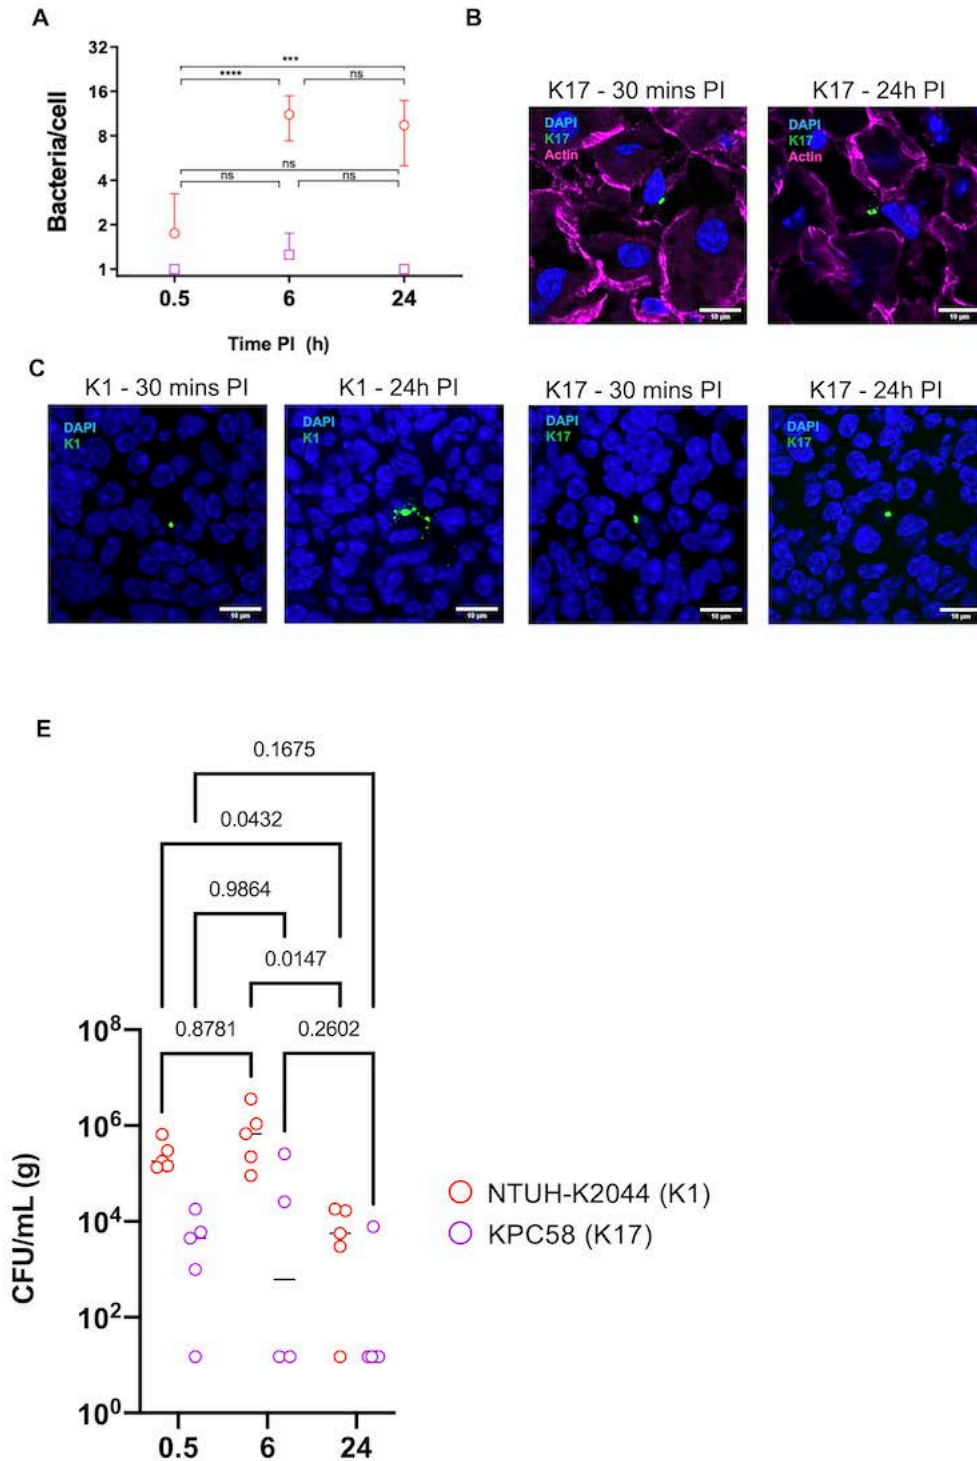

**Figure S5. Foci size analysis of time course infections in the murine spleen.** (A) Size of bacterial clusters associated with host cells in mouse spleens infected with either K1 (red) or K17 (purple) *Kp* at 0.5, 6, and 24h post infection. Error bars represent the standard error of the mean. Statistical comparison was performed by 1-way ANOVA. \*\*\*\*;  $p < 0.00005$ , \*\*\*;  $p < 0.0005$ , ns; not significant. (B) Representative confocal microscopy images of K17 infected livers at 0.5 and 24 hours post infection. *Kp* are shown in green, actin in magenta, and nuclei

in blue. (C) Representative confocal microscopy images of K1 and K17 infected spleens at 0.5 and 24 hours post infection. *Kp* are shown in green, and nuclei in blue. (D) Bacterial counts in the murine spleen after intravenous infection with  $10^6$  CFU of K1 (red) or K17 (magenta) *Kp*. Values are expressed as CFU/g of organ. Statistical analysis was performed by 2-way ANOVA. \*;  $p > 0.05$ , ns; not significant.



**Figure S6. Evidence of Kupffer cell lysis following infection.** Mice were infected for 24h with  $10^6$  CFU of *Kp* strain NTUH-K2044, and their livers were analysed by confocal microscopy followed by staining with different antibodies. (A) Shows a Kupffer cell which is heavily infected with *Kp*, such that the bacteria extend across the cell into the neighbouring area. Nuclei; blue, *Kp*; green, CD169; red, Actin; cyan. (B) Shows a maturing abscess with *Kp* spread across multiple cells in many cases co-localising with neutrophils. Nuclei; blue, *Kp*; green, Ly-6G; magenta. (C) Representative H&E stains, and accompanying neutrophil IHC of mouse liver following 48h of infection with either with K17 *Kp*. 3 levels of increasing magnification are shown from left to right. (D) F4/80 immunostain of murine liver infected with K1 *Kp* at 48h post infection showing the absence of macrophages in the dense PMN cell centre. (E) Area in micron squared of neutrophil fluorescence signal in immunostained liver from mice infected for 48h with hv*Kp*. A cut-off value at  $85 \mu\text{m}^2$  excluding single neutrophils was introduced (dotted line); median and confidence values are indicated in the graph. Error bars show the standard deviation.



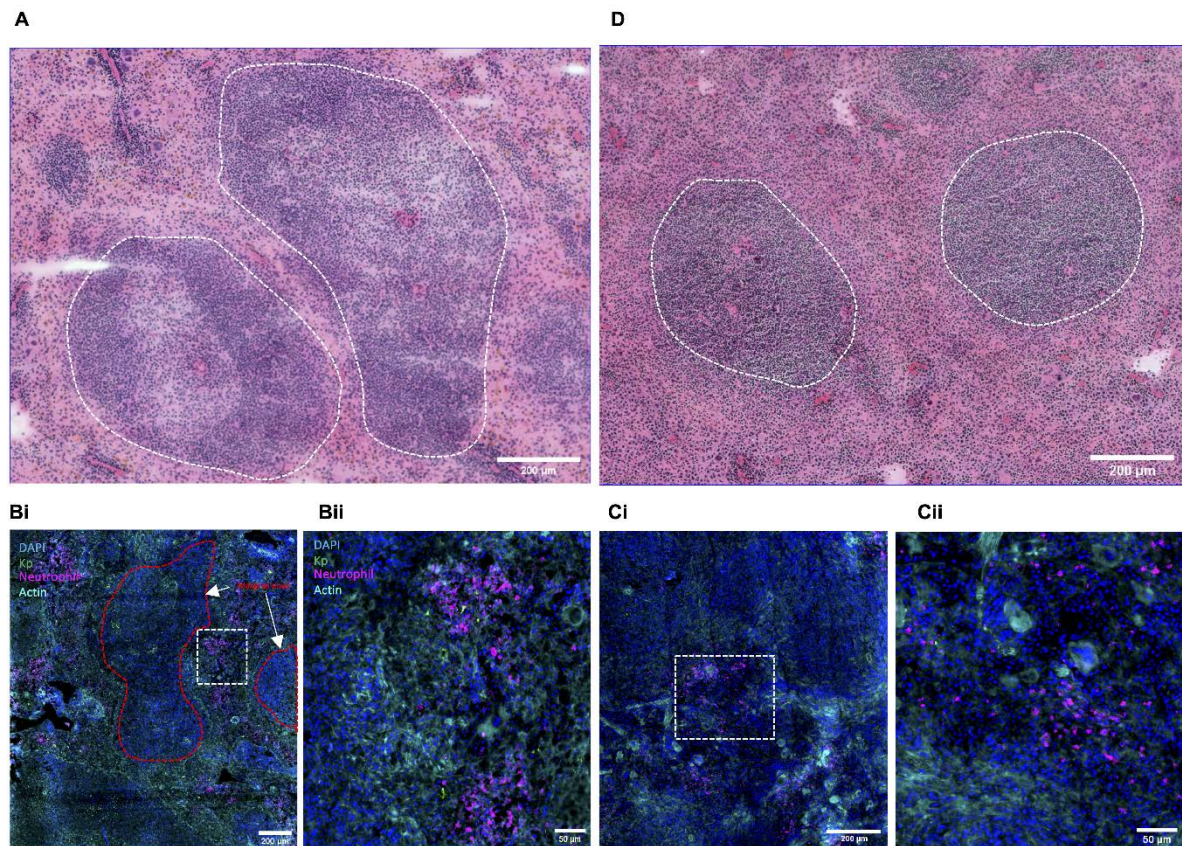

**Figure S7. Histological features of *Kp* infected mouse spleens.** H&E stain of a mouse spleen infected for 48h with hv*Kp* strain NTUH-K2044 (A) or with the non-hv*Kp* strain KPC58 (B). In both images the border between the splenic white pulp and red pulp are shown by a dotted white line. For both images, the scale bar is 200 μm in width. (Bi) Fluorescence image of the murine spleen infected for 48h with hv*Kp*. The border of the splenic white pulp is shown by a dotted red line. A dotted white line indicates an infected area, which is shown at higher magnification in Bii. (Ci) Fluorescence image of the murine spleen infected for 48h with non-hv*Kp*. A dotted white line indicates an infected area, which is shown at higher magnification in Cii. For Bi and Ci, the scale bar is 200 μm in width. For Bii and Cii, the scale bar is 50 μm in width. All samples are stained for nuclei (blue), bacteria (green), neutrophils (magenta) and actin (cyan).

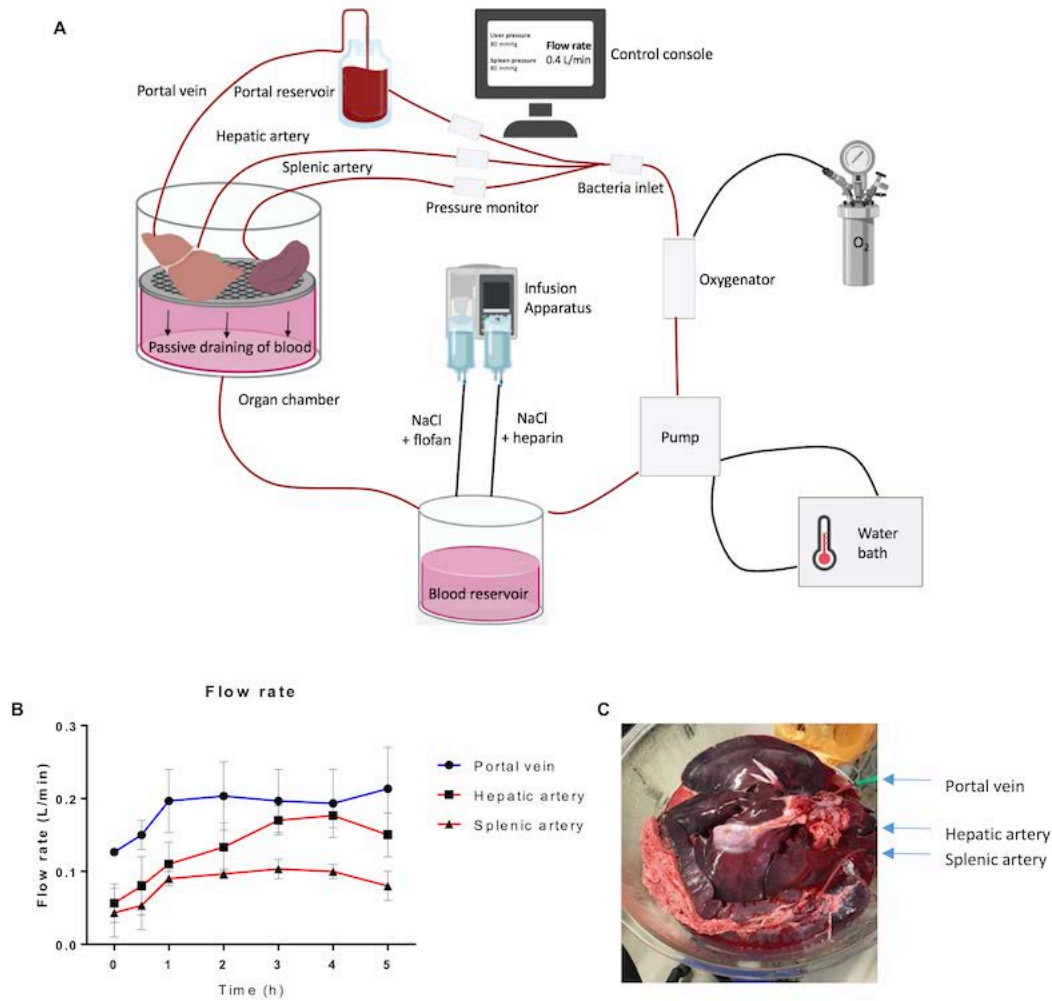

**Figure S8. A normothermic model of liver-spleen co-perfusion for studies of *Kp*-host interactions.** (A) The circuit consists of a chamber which holds both spleen (cannulated via the splenic artery) and liver (cannulated by the hepatic artery and portal vein). Blood drains from this chamber into a blood reservoir which is fed with Flofan (vasodilator) and Heparin (anticoagulant) solutions. From here, blood is pumped through a water bath which maintains a steady 37°C temperature, and then through an oxygenator. At this point, there is an inlet for bacterial inoculation, before the circuit splits into 3 vessels: the splenic artery, the hepatic artery, and the portal vein via an additional blood reservoir. Each of these vessels is monitored for pressure, which is relayed on the control console. (B) Flow rate is monitored for each vessel at regular time points. The portal vein is shown by black circles with a blue line, the hepatic artery is shown by black squares with a red line, and the splenic artery is shown by black triangles with a red line. (C) Shows a photograph of the organs *in situ*, with the cannulated portal vein, splenic artery, and hepatic artery indicated by blue arrows.

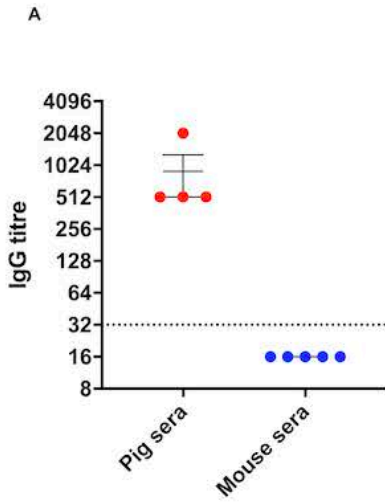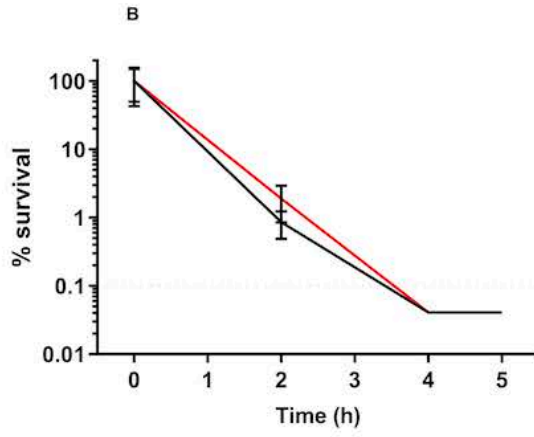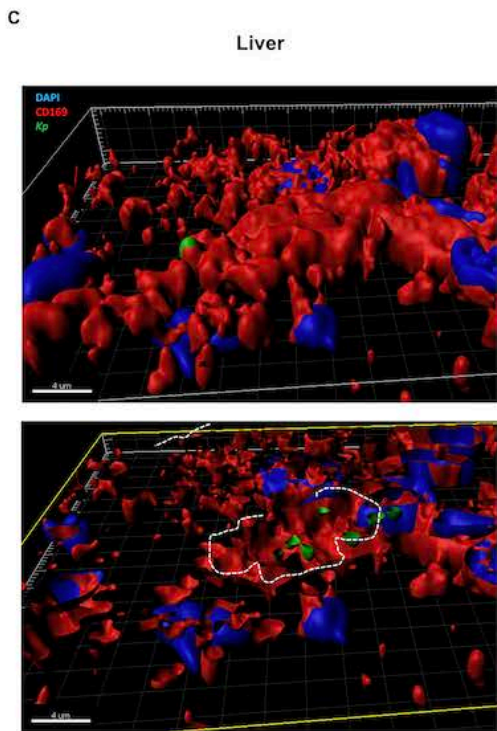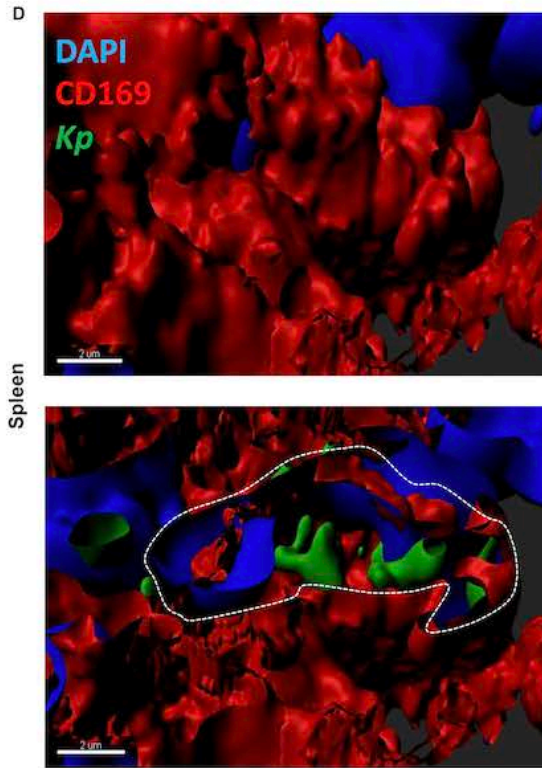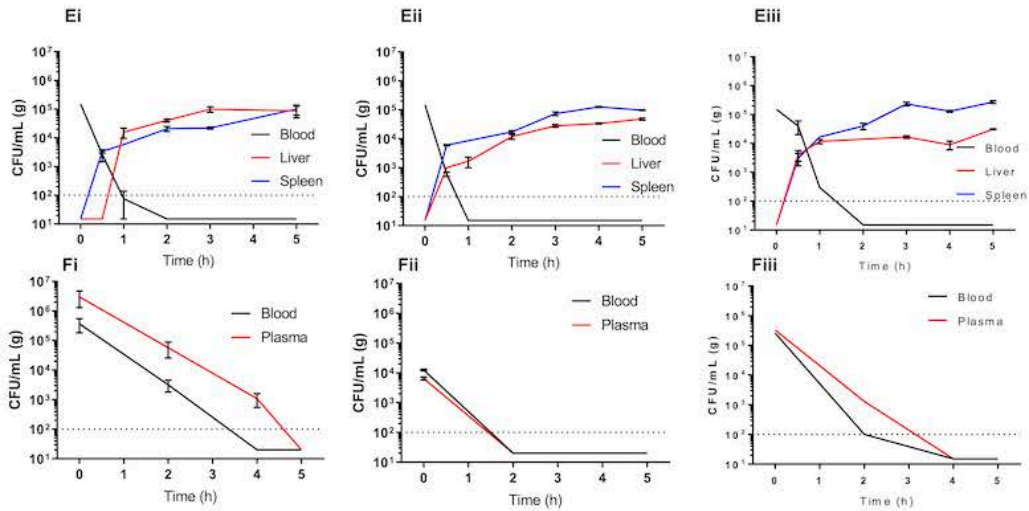

**Figure S9.** (A) IgG titres of murine and porcine sera used in this study against K2 *Kp* GMR151. Titres were defined as the reciprocal of the last dilution giving signal above the negative control. (B) Whole pig blood, and serum survival of bacteria following inoculation of  $\sim 5 \times 10^5$  CFU of *Kp* K2 GMR151. Blood counts are shown in black, and plasma counts are shown in red. (C) Representative 3D reconstruction of Z-stacks of *Kp* infected liver and splenic (D) macrophages in the porcine model. The cell border is indicated with a dotted white line. (Ei-iii) 3 independent replicates of CFU data from ex vivo perfusion experiments. Blood counts are shown in black, liver counts in red, and spleen counts in blue. The limit of detection is shown by a dotted black line. The error bars indicate the standard deviation of 3 technical replicates. (Fi-iii) 3 independent replicates of whole pig blood, and serum survival of bacteria following inoculation of  $\sim 5 \times 10^5$  CFU of *Kp* K2 GMR151. Blood counts are shown in black, and plasma counts are shown in red. (C) IgG titres of murine and porcine sera used in this study against K2 *Kp* GMR151. Titres were defined as the reciprocal of the last dilution giving signal above the negative control.

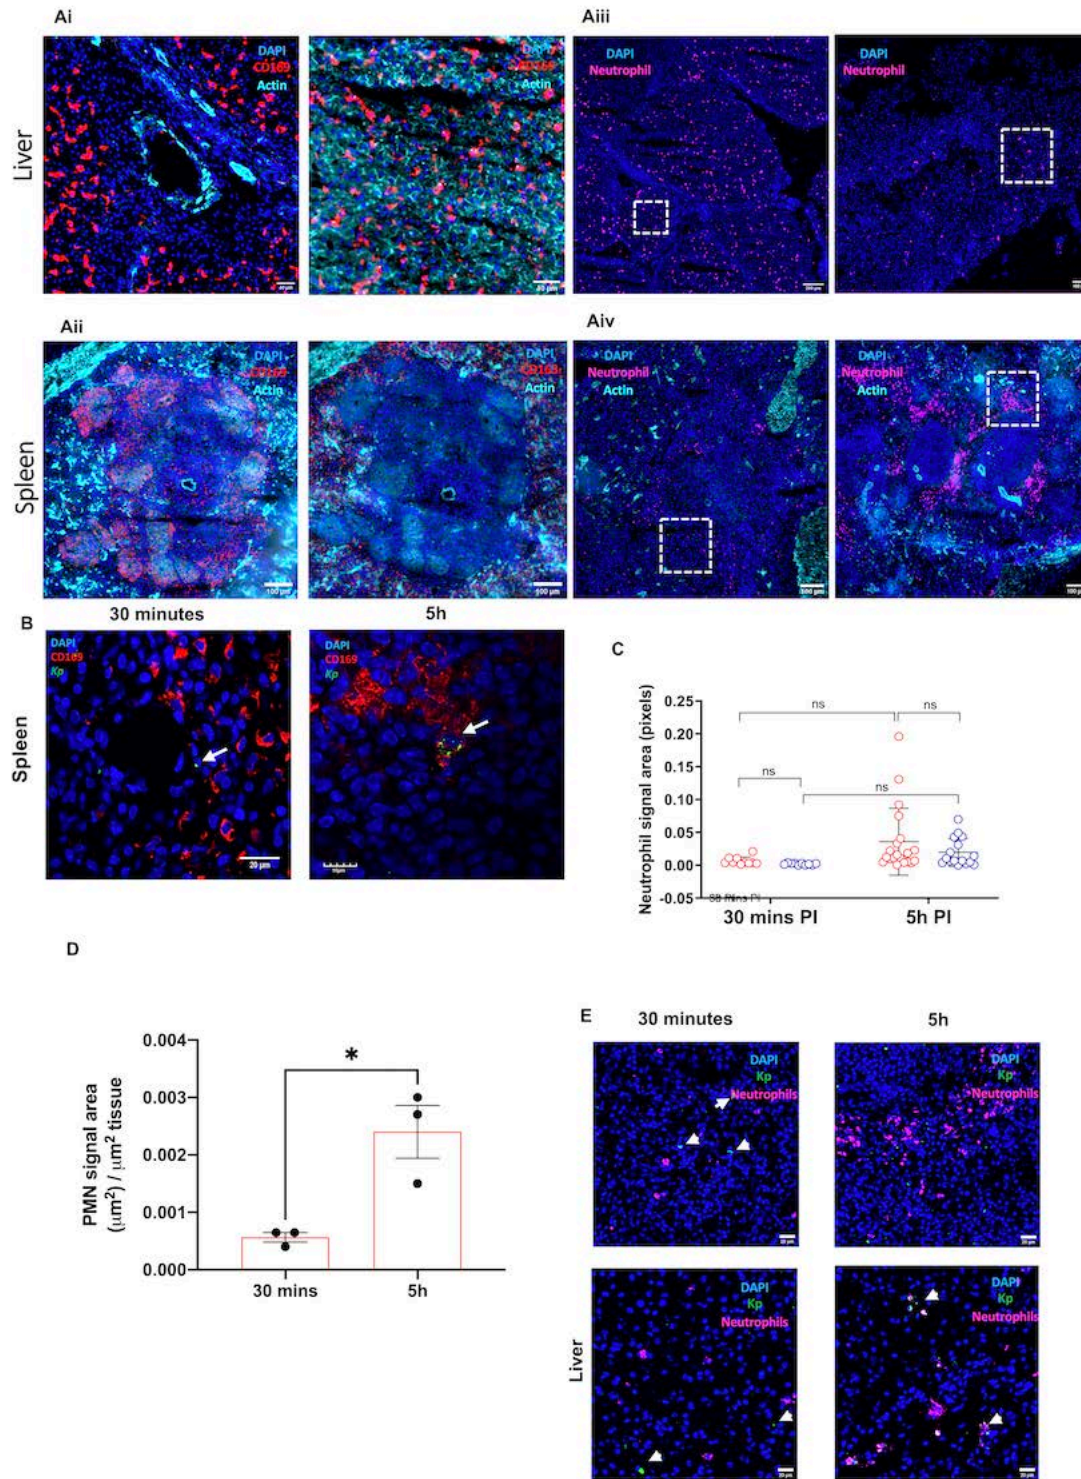

**Figure S10. Microarchitecture of the porcine liver and spleen visible through multispectral imaging.** (Ai) Images of a hepatic vessel at the intersection of 3 porcine liver lobuli, Kupffer cell distribution in the parenchyma of the porcine liver. Both sections are stained for nuclei (blue), CD169 (red), and actin (cyan). In both, scale bars are 40  $\mu\text{m}$  in width. (Aii) Low magnification image of a porcine splenic follicle, with the major artery in the centre of the image, stained for nuclei (blue), actin (cyan), and either CD169 (red) which identifies the peri-

arteriolar lymphoid sheath macrophages, or CD163 (red) which delineated the splenic red pulp macrophages. Low magnification image of the porcine liver (Aiii) and spleen (Aiv) 30 minutes or 5h post infection with GMR151, stained for neutrophils (magenta), nuclei (blue), and *Kp* (green). In each image, the area from which the high magnification image in Figure 6 is indicated by a dotted white line. (B) representative images of bacteria clusters in *Kp* infected porcine spleens at 30 minutes and 5h post infection. CD169 are shown in red, *Kp* in green, and nuclei in blue. White arrows indicate the location of bacteria, and scale bars are shown in the images. (C) Neutrophil signal area within a 50  $\mu\text{m}$  radius of infected (red circles) or random non-infected (blue circles) macrophages, at 30 minutes and 5h post-infection of the porcine spleen. Data are representative of entire tissue sections ( $\sim 2\text{cm}^2$ ) from 3 replicate organs. Statistical significance was determined using a 1-way ANOVA. \*\*\*,  $p < 0.0005$ , \*\*,  $p < 0.005$ , \*, NS;  $p > 0.05$ . (D) Neutrophil influx to the entire liver tissue section (30 min black, 5h red). Whole tissue sections from 3 replicate organs were analysed. Data are expressed as neutrophil fluorescence signal area per unit whole tissue area. (E) Representative confocal microscopy images of 30 minute and 5h infected porcine livers and spleens. Bacteria are shown in green, neutrophils are in magenta, and nuclei are shown in blue.

## Supplementary Methods

### Bacterial strains and culture conditions

Thirteen *Kp* strains of clinical origin, encompassing 5 capsular serotypes, including three hv*Kp* strains of serotype K1, three of K2, three non-hv*Kp* carbapenem-resistant (CR) strains of serotype KL17, one of serotype KL103, and three of KL107, were used (Table 1; for full set of strain metadata see Table S1). The hypermuroid phenotype of all strains was confirmed by the string-test method<sup>9</sup>. Strains of *Kp* were grown in Brain Heart Infusion (BHI, Oxoid) broth for liquid culture, and on Lysogeny Broth Agar (LA, Oxoid) as a solid medium, at 37°C. All bacteria were stored at -80°C, in BHI broth supplemented with 10% v/v glycerol (Sigma). For infection stocks, bacteria were incubated overnight and then diluted 1:100 into fresh BHI and cultured to an optical density (OD<sub>600nm</sub>) of 0.3. Samples were frozen at -80°C, with 10% glycerol and one aliquot was counted prior to infection.

### Bacteria growth assays

For assessing bacterial growth, colonies were suspended in PBS to an OD<sub>600nm</sub> of 0.2, and then diluted 1:100 into either BHI medium, whole blood, or serum. Cultures were incubated in flat-bottomed 96-well microtiter plates (Sigma) in a plate reader at 37°C, and OD<sub>600nm</sub> values monitored every 5 minutes for 24h in the case of BHI, whereas blood and serum cultures were analysed by serial dilution and colony counting.

### Rabbit IgG purification and fluorophore conjugation

IgG was purified from the rabbit K1 or K2 sera (Statens Serum Institut, Copenhagen) using a protein-G agarose kit (Roche). The protein concentration of the IgG preparation was determined by the Bradford assay, using bovine serum albumin as a standard. Purified anti-K1 and K2 IgG were conjugated with Texas red, and FITC respectively, using the easy FITC/Texas red labelling kits (Abcam), according to the manufacturer's instructions.

### Confocal microscopy, whole tissue section scanning microscopy, and image analysis

For analysis of bacterial distribution in tissues, immunostained tissue sections were imaged on a Vectra Polaris digital pathology system (Perkin Elmer; hereafter referred to as a 'slide scanner') using a 40x/NA=0.75 objective and Opal480, 520, 620, and 690 filter cubes. For quantitative analysis of the co-localisation of bacteria with particular cell populations in Vectra Polaris slide scans, an analysis pipeline was developed in Fiji (Figure S1). To delineate subcellular localisation of bacteria, Z-stacks of tissue samples stained with macrophage surface markers were acquired with an FV1000 Olympus Confocal laser scanning microscope

using a 60x/NA=1.35 objective and consistent step sizes of 0.25  $\mu\text{m}$ . Confocal microscopy images were visualised in Fiji and Imaris 3D V9.4 reconstruction software was used for 3D visualisation of Z-stacks (Bitplane, Switzerland). Line scan analysis of confocal images was performed using a custom macro written in Fiji. For light microscopy imaging of haematoxylin and eosin stains, a fully motorised Nikon eclipse Ti microscope with a Nikon DS-Fi2 colour camera and a Plan Apo TIRF 100X oil objective was used. For scanning microscopy analysis, at least 2 tissue sections were analysed per mouse, whereas for confocal analysis, we display images representative of greater than 10 fields of view. In all cases, control tissue sections with the addition of no primary antibodies were performed.

### **Murine neutrophil isolation and bactericidal assay**

Blood was collected from CD1 mice by cardiac puncture, under terminal anaesthesia, into EDTA vacutainers (BD Diagnostics-Preanalytical Systems, UK). Neutrophils were isolated by gradient centrifugation, as before <sup>10</sup>, using Histopaque-1077 (Sigma, UK) and Histopaque-1119 (Sigma-Aldrich, UK). Neutrophil purity was assessed by confocal microscopy with anti-Ly6G antibody (Table S1). For bactericidal assays, frozen stocks of *Kp* were suspended in HBSS with  $\text{Ca}^{2+}/\text{Mg}^{2+}$  before infecting the neutrophil suspension at a MOI of 10 and incubation for 2h at 37°C under rotation.

### **Culture and infection of J774a murine macrophages**

J774.A1 mouse ascites macrophages (ATCC® TIB-67™) were grown in RPMI (Thermo Fisher, US) + 10% FBS and routinely passaged at 80% confluency. 96-well plates (Thermo Fisher, US) and 8-well chamber slides (Thermo Fisher, US) were seeded at a density of  $1 \times 10^5$  cells/ml and incubated overnight.

Overnight cultures of *K. pneumoniae* strains were diluted 1:100 and grown to an  $\text{OD}_{600}$  of 0.4. 30 minutes before infection. *K. pneumoniae* was added to the cells at an MOI of 10, and the plates were centrifuged at 200 x g for 5 minutes to synchronise infection of the cells. Following 30 minutes incubation at 37°C, 5%  $\text{CO}_2$ , bactericidal antibiotics (300 $\mu\text{g}/\text{ml}$  Gentamicin + 15 $\mu\text{g}/\text{ml}$  Polymyxin B) were added for a further 30 minutes. The 4-hour post-infection wells were replaced with antibiotic at the minimum inhibitory concentration for each strain. At each time point, cells were lysed with 0.1% w/v Saponin, serially diluted 10-fold in BHI and plated for CFU enumeration. Chamber slide wells were fixed and stained for immunofluorescence as before [12].

### **Ex vivo gentamicin protection assay**

Four 6-8 weeks old female CD1 mice were intravenously infected with  $10^6$  CFU *Kp* strain NTUH-k2044 into the lateral tail vein. At 4 hours post-infection, mice were culled as per the



home office license for retrieval of livers, which were kept separate throughout the entirety of the experiment. Each liver was subject to digestion via injection with enzymatic cocktail solution, consisting of 32mg/ml Collagenase D (Sigma, UK) and 0.1% w/v DNase (Sigma, UK), and incubation at 37°C for 30 minutes. Livers were then gently homogenised through a 100µm cell strainer (Sigma, UK), and erythrocytes were lysed by addition of Gey's lysis solution whilst on ice for 3 minutes. Cells were washed thrice for removal of cell debris, before hepatocytes were pelleted via a 50 x g centrifugation for 3 minutes at 4°C. The supernatant was collected, and cell density and viability were determined. Three lots of  $1 \times 10^6$  cells were subject to either i) 37°C incubation for 1 hour with bactericidal antibiotics (DMEM (Thermo Fisher, US) + 10% FBS (Sigma, UK) + 300µg/ml Gentamicin + 15µg/ml Polymyxin B), three washes in PBS then lysis by addition of 0.1% w/v Saponin (Sigma, UK) ii) Lysis by 0.1% w/v Saponin, 5000 x g centrifugation for 10 minutes to pellet bacteria, resuspension in bactericidal antibiotic solution as above, and three washes in PBS or iii) Lysis by 0.1% w/v Saponin only. In all instances, the final solution was 10-fold serially diluted in BHI and plated for CFU enumeration.

### **Whole cell ELISA**

K2 strain GMR151 was streaked onto LA plates, and incubated overnight at 37°C. The following day, single colonies were inoculated into 5mL of LB broth, and incubated o/n at 37 °C. The following day, samples were sub-cultured 1:100 into fresh LB broth and grown at 37 °C until an OD<sub>600</sub> of 0.4. Samples were then pelleted at 3000 X G for 10 minutes, washed 3x in PBS, and resuspended in dH<sub>2</sub>O to a final OD<sub>600nm</sub> of 0.4. 100µl of bacterial suspension was dispensed into wells of the ELISA plate, which were dried o/n at room temperature in a biological safety cabinet to coat. The following day, samples were fixed in 100 µl of methanol, and left to dry o/n in a BSc. The following day, un-coated bacteria were removed, wells were washed 3x with PBS before proceeding with the ELISA protocol.

All steps of the ELISA protocol were performed at room temperature. Coated wells were first washed 3x with PBS supplemented with 0.05% (v/v) tween20 (Sigma). Wells were then incubated for 1h with 100µl of PBS supplemented with 5% (w/v) skimmed milk powder (Oxoid), 0.05% (v/v) tween20, and 0.001% (v/v) naïve goat serum (Sigma), to block non-specific binding sites. Samples were then probed for 1h with 50 µl of the sera of interest, diluted 2-fold in blocking buffer starting from 1:8, to a maximum dilution of 1:16384, including a no sera negative control. Plates were then washed 3x in wash buffer and probed for 1h with a secondary antibody conjugated

with horseradish peroxidase raised against either murine (Sigma), or porcine (Abcam) IgG (diluted 1:40,000 and 5000 respectively). Samples were then washed 3x in wash buffer and incubated for 10 min with 50  $\mu$ l of tetramethylbenzidine (TMB; Sigma). The reaction was then stopped by adding 50  $\mu$ l of 1M sulphuric acid (Sigma), before measuring the absorbance at 450nm using an Eon (Biotek) plate reader. All ELISAs were performed in at least duplicate.

## Supplementary references

1. Fang CT, Chuang YP, Shun CT, Chang SC, Wang JT. A Novel Virulence Gene in *Klebsiella pneumoniae* Strains Causing Primary Liver Abscess and Septic Metastatic Complications. *Journal of Experimental Medicine*. 2004; 199(5):697-705.
2. Arena F, Spanu T, de Angelis LH, et al. First case of bacteremic liver abscess caused by an ST260-related (ST1861), hypervirulent *Klebsiella pneumoniae*. *Journal of Infection*. 2016; 73(1):88-91.
3. Lee IR, Molton JS, Wyres KL, et al. Differential host susceptibility and bacterial virulence factors driving *Klebsiella* liver abscess in an ethnically diverse population. *Scientific Reports*. 2016; 6:29316.
4. Cannatelli A, D'Andrea MM, Giani T, et al. In vivo emergence of colistin resistance in *Klebsiella pneumoniae* producing KPC-type carbapenemases mediated by insertional inactivation of the PhoQ/PhoP mgrB regulator. *Antimicrobial Agents and Chemotherapy*. 2013;57(11):5521-5526.
5. Castronovo G, Clemente AM, Antonelli A, et al. Differences in inflammatory response induced by two representatives of clades of the pandemic st258 *Klebsiella pneumoniae* clonal lineage producing KPC-type carbapenemases. *PLoS ONE*. 2017; 12(6):e0178847.
6. Bi D, Jiang X, Sheng ZK, et al. Mapping the resistance-associated mobilome of a carbapenem-resistant *Klebsiella pneumoniae* strain reveals insights into factors shaping these regions and facilitates generation of a “resistance-disarmed” model organism. *Journal of Antimicrobial Chemotherapy*. 2015;70(10):2770-2774.
7. Arena F, di Pilato V, Vannetti F, et al. Population structure of KPC carbapenemase-producing *Klebsiella pneumoniae* in a long-term acute-care rehabilitation facility: Identification of a new lineage of clonal group 101, associated with local hyperendemicity. *Microbial Genomics*. 2020;6(1):e000308..
8. Lee HC, Chuang YC, Yu WL, et al. Clinical implications of hypermucoviscosity phenotype in *Klebsiella pneumoniae* isolates: Association with invasive syndrome in patients with community-acquired bacteraemia. *Journal of Internal Medicine*. 2006;259(6):606-614.
9. Muntaka S, Almuhan Y, Jackson D, et al. Gamma interferon and interleukin-17A differentially influence the response of human macrophages and neutrophils to *Pseudomonas aeruginosa* infection. *Infection and Immunity*. 2019;87(2):e00814-18.
